# Supplementary material for: Reduced Left Atrial Emptying Fraction and Chymase Activation in Pathophysiology of Primary Mitral Regurgitation
Source: PubMed Central journal article supplement — JACC Basic Transl Sci. 2020 Jan 22;5(2):109–22. doi: 10.1016/j.jacbts.2019.11.006 (PMC7046515; doi:10.1016/j.jacbts.2019.11.006), 2020-01-22
Supplement: mmc1.pdf [file mmc1.pdf]

### ***Hematoxylin & Eosin (H&E) and Immunohistochemistry (IHC)***

Paraffin embedded sections were incubated with antibodies: desmin (Abcam #ab15200, 1:200), chymase (Abcam #ab2377, 1:50) and Alexa Fluor 488- and 594-conjugated secondary antibodies (1:700, Life Technologies) and appropriate host combinations were used to stain for visualization. Nuclei were labeled with DAPI (1.5µg/ml, Vector Laboratories #H-1500).

### ***Collagen Analysis***

Collagen quantification was performed on MR and non-failing atrial tissue immersion-fixed in 10% buffered formalin, embedded in paraffin, sectioned at 4µm thickness, and stained with Picric Acid Sirius Red F3BA. Quantitative analysis was performed by light microscopy (Leica Microsystems, Bannockburn, IL) with a Hamamatsu ORCA ER cooled CCD camera and a digital-based image-analyzer system (Image-Pro Plus, MediaCybernetics, San Diego, CA). Collagen volume percent was quantitatively evaluated at low power (10x objective, 800x total magnification) for total collagen. The Picric Acid Sirius-stained sections were viewed with a 540-nm (green) filter to provide grayscale contrast of the collagen with the background. Volume percent collagen was determined from 10 to 20 randomly selected fields in each section, and the mean value was calculated for each patient. All morphometric measurements were performed in a blinded manner. Results are presented as the mean ± SD values computed from the average of individual measurements obtained from each biopsy.

### ***Western blots for Myosin***

Tissue (RA, LA or LV) was powdered with a mortar & pestle under liquid nitrogen then homogenized in RIPA buffer containing protease and phosphatase inhibitors (PIERCE). Tissue homogenates (2.5ug) were denatured at 95°C for 5 minutes in NuPAGE™ LDS Sample Buffer containing NuPAGE™ sample reducing agent (Invitrogen). Samples were separated on a NuPAGE™ Novex 6% Tris-Glycine protein gels (Invitrogen), transferred to a 0.2µm PVDF membrane (Invitrogen) and probed with antibodies to myosin heavy chain MF-20 (mouse

monoclonal; 1:400; DHSB) or GAPDH (rat; 1:2500; Abcam #ab9485) for 4 hours at room temperature in 5% Blotto in phosphate buffered saline + 0.1% Tween-20 (PBST). Membranes were washed in PBST then incubated in horse radish peroxidase (HRP)-conjugated secondary antibodies (Bio-Rad Laboratories; 1:5000) for 1-1.5 hours at room temperature in 5% Blotto. HRP signals were developed using Clarity Western enhanced chemiluminescence substrate (Bio-Rad Laboratories) on a FluorChem M system (Protein Simple).

### ***Transmission electron microscopy (TEM)***

Ten MR biopsies were fixed in 2.5% Glutaraldehyde/Sorensen's Phosphate Buffer (Electron Microscopy Sciences #15980) overnight at 4°C. Tissue was processed for TEM and sections were viewed in a Philips 201 TEM (FEI Co.) by EMLabs Inc (Birmingham, AL) for qualitative changes in ultrastructure. For immunogold TEM, human heart biopsies were submerged in 0.1% glutaraldehyde/2% paraformaldehyde in cardioplegic buffer (5% dextrose, 30 mmol/L KCl in PBS), further fixed in the same fixative in cacodylate buffer, incubated in 0.1 mol/L glycine/PBS, dehydrated in series of N, N-dimethyl formamide, and embedded in LRWhite resin. Ultrathin (90 nm) sections (10-12) were picked up on nickel grids (3 mm) and dried. Before immunogold labeling, grids were rinsed in PBS and blocked for 1.5 h with 1% BSA, 0.1% cold water fish skin gelatin, and 1% Tween 20 in PBS. Grids were then incubated with chymase antibody (Bioss 2353R), diluted 1:25 with 1% BSA/PBS first for 2 h at room temperature (RT) and then overnight at 4°C. The grids were rinsed with PBS, blocked and incubated (RT, 2h) with goat anti-rabbit IgG tagged with colloidal gold (10-nm particle size, diluted 1:50 with 1% BSA/PBS) (Aurion/Electron Microscopy Sciences). Sections were postfixed and counterstained with uranyl acetate and viewed on a FEI-Tecnaï T12 Spirit 20 electron microscope.

### ***Chymotryptic Assay***

A modified extraction method was used to isolate tissue chymase from RA, LA or LV using a two buffer extraction method as previously described in our laboratory.<sup>13</sup> Briefly, tissue (10-20 mg) was homogenized in ice cold low salt lysis buffer (10mM Tris-Cl, pH 8.0, 1 mM

EDTA containing the following inhibitors: E-64, Pepstatin A, Bestatin hydrochloride, 4-chloromercuribenzoic acid, Lisinopril all at 50 $\mu$ M, amastatin hydrochloride at 10  $\mu$ M, and epoxomicin at 1  $\mu$ M), and subjected to a freeze/thaw cycle five times to break up cells and tissue compartments, centrifuged at 16,000 x *g* for 30 minutes and the supernatant discarded.

The pellet was re-suspended in 1 mL of ice cold low salt buffer and incubated on a rotator for 3 hours at 4°C, followed by centrifugation at 10,000 x *g* for 30 minutes and the supernatant set aside (low salt extract). The pellet was re-suspended in high salt lysis buffer (100mM Tris-Cl, pH 8.0, 1mM EDTA, 2M NaCl containing the same inhibitors listed above for the low salt buffer) overnight with rotation at 4°C to extract chymase. Samples were centrifuged at 10,000 x *g* for 30 minutes and the supernatant collected for enzymatic assay (high salt tissue extract).

Chymotryptic enzyme activity was measured in 0.2 mL of high salt tissue extract with the addition of the fluorescent substrate N-Succinyl-Ala-Ala-Pro-Phe-7-amido-4 methylcoumarin (10 $\mu$ M, Sigma S9761). All samples and fluorescent standards of the chromophore 7-Amino-4-methylcoumarin (Sigma A9891) were run in duplicate on a SpectraMax i3x (Molecular Devices) in a 96-well kinetic plate assay for 1 hour (1 minute interval reads) at 37°C with an excitation spectrum of 360nm and emission of 460nm. Protein concentration in high salt extracts was quantified with the CB Protein Assay kit (G Biosciences 786-012) with bovine serum albumin (BSA) as the standard. Chymotryptic activity was expressed as fmol/mg/min. The chymotryptic activity is only found in the high salt extract.<sup>13</sup>

### ***In situ chymotryptic activity***

Chymase activity was verified by *in situ* chymotryptic activity as described previously by our laboratory.<sup>13</sup> Briefly, fresh LV tissue was fixed in 4% paraformaldehyde for 6 hours at room temperature, transferred to 25% sucrose overnight at 4°C, then embedded in OCT compound (Tissue-Tek #4583). Fixed-frozen 5 $\mu$ m sections were thawed, washed 3 times in PBS, and incubated in Reaction Mixture at 37°C for 3 hours. Sections were rinsed in water and counterstained with Basic Fuchsin (Electron Microscopy Sciences #11260, 0.05%) for 1-2

seconds to achieve a pale pink background, and viewed under bright field microscopy. The Reaction Mixture consisted of 0.53mM Naphthol AS-D chloroacetate (MP Biomedical #02102424.1), 0.3mM Fast Blue BB Salt (Sigma #44670) dissolved in N,N-Dimethylformamide (Sigma #D4451, final 3.8%) vortexed and then immediately added to a final concentration of 50mM Tris-Cl pH 7.5 (Fisher #BP154-1), 40mM NaF (Acros Organics #191270250), and 1% Triton X-100 (Fisher #BP151). The mixture was stirred for 2-3 minutes until a dark blue color appeared. The solution was prepared in the dark, filtered and used immediately.

### ***Chymase mRNA production by in situ hybridization***

The expression of human chymase (CMA1) mRNA was measured by *in situ* hybridization as previously described in our laboratory.<sup>13</sup> The CMA1 cDNA flanked by the KpnI and EcoRI restriction sites (sequence shown below) was synthesized and cloned to the pBluescript II KS(+) vector by GenScript (Piscataway, NJ, USA). The resulting construct was confirmed by sequencing. The antisense and sense probes were synthesized with a digoxigenin (DIG) RNA labeling kit (Roche, #11175025910) utilizing the T7 and T3 RNA polymerase promoter in the pBluescript II KS(+) vector, respectively. *In situ* hybridization was carried out on 5µm formalin-fixed, paraffin embedded atrial sections from MR patients using the antisense probe. The sense probe was used as a control.

```
ggtagccgacc atgctgctc ttctctccc cctgctgctc ttctcttgt gctccagagc tgaagctggg gagatcatcg  
ggggcacaga atgcaagcca cattcccgcc cctacatggc ctacctggaa attgtaactt ccaacgggcc ctcaaaattt  
tgtgtggtt tcctataag acggaacttt gtgctgacgg ctgctcattg tgcaggaagg tctataacag tcacccttgg  
agcccataac ataacagagg aagaagacac atggcagaag ctgaggtta taaagcaatt ccgcatcca aatataaca  
cttctactct tcaccacgat atcatgttac taaagttgaa ggagaaagcc agcctgaccc tggctgtggg gacactcccc  
ttccatccc aattcaactt tgtccacct gggagaatgt gccgggtggc tggctgggga agaacagggtg tgttgaagcc  
gggctcagac actctgcaag aggtgaagct gagactcatg gatccccagg cctgcagcca cttagagac ttgaccaca  
atctcagct gtgtgtggc aatccagga agacaaaatc tgcatttaag ggagactctg ggggcctct tctgtgtgct  
ggggtggccc agggcatcgt atcctatgga cggtcggatg caaagcccc tgctgtctc acccgaatct ccattaccg  
gccctgatc aaccagatcc tgcaggcaaa ttggaattc
```

| <b>Table 1. Mitral Regurgitation Demographics and Baseline Echo Data. — indicates transesophageal echo/Doppler only.</b> |                  |            |             |                                                       |            |                 |             |                   |                   |                 |                 |
|--------------------------------------------------------------------------------------------------------------------------|------------------|------------|-------------|-------------------------------------------------------|------------|-----------------|-------------|-------------------|-------------------|-----------------|-----------------|
| <b>Patient ID</b>                                                                                                        | <b>Age (yrs)</b> | <b>Sex</b> | <b>Race</b> | <b>Medications</b>                                    | <b>HBP</b> | <b>AF (Pre)</b> | <b>NYHA</b> | <b>LVEDD (cm)</b> | <b>LVESD (cm)</b> | <b>LVEF (%)</b> | <b>LAD (cm)</b> |
| 1                                                                                                                        | 60               | Female     | White       | Atenolol, flecainide, rivaroxaban                     | No         | Yes             | 3           | 5.4               | 3.4               | 65              | —               |
| 2                                                                                                                        | 82               | Male       | White       | Apixaban, furosemide, lisinopril                      | No         | No              | 3           | 4.6               | 3.4               | 50              | 5.9             |
| 3                                                                                                                        | 62               | Male       | White       | Glucophage, HCTZ                                      | No         | Yes             | 1           | 5.3               | 3.2               | 60              | 3.0             |
| 4                                                                                                                        | 50               | Male       | White       | None                                                  | Yes        | No              | 2           | 5.6               | 3.7               | 63              | 4.2             |
| 5                                                                                                                        | 48               | Female     | Black       | None                                                  | No         | No              | 2           | —                 | —                 | 55              | —               |
| 6                                                                                                                        | 48               | Male       | White       | None                                                  | No         | No              | 3           | 5.6               | 3.5               | 67              | 5.6             |
| 7                                                                                                                        | 68               | Female     | White       | Furosemide, metoprolol, losartan                      | No         | No              | 3           | —                 | —                 | 65              | —               |
| 8                                                                                                                        | 73               | Male       | White       | Pravastatin                                           | No         | No              | 1           | 4.6               | 3.1               | 60              | 3.9             |
| 9                                                                                                                        | 73               | Male       | White       | None                                                  | Yes        | No              | 1           | 6.6               | 4.4               | 72              | 5.7             |
| 10                                                                                                                       | 53               | Female     | White       | None                                                  | No         | No              | 3           | 4.6               | 3.9               |                 | 4.9             |
| 11                                                                                                                       | 77               | Male       | White       | Rivaroxaban, diltiazem, rosuvastatin                  | No         | Yes             | 2           | —                 | —                 | 55              | —               |
| 12                                                                                                                       | 63               | Male       | Black       | Carvedilol, furosemide, lisinopril, metformin, statin | Yes        | No              | 2           | —                 | —                 | 60              | —               |
| 13                                                                                                                       | 58               | Male       | White       | Metoprolol, statin                                    |            | No              | 2           | 5.1               | 3.5               | 60              | 3.1             |
| 14                                                                                                                       | 39               | Male       | White       | None                                                  | No         | No              | 3           | 6.3               | 3.5               | 72              | 6.6             |
| 15                                                                                                                       | 55               | Female     | Black       | Lisinopril, statin, glyburide                         | Yes        | No              | 3           | 4.9               | 2.7               | 70              | —               |
| 16                                                                                                                       | 56               | Female     | Black       | Atenolol                                              | Yes        | No              | 2           | 4.5               | 2.6               | 70              | 3.1             |
| 17                                                                                                                       | 50               | Male       | White       | Metoprolol, apixaban, flecainide                      | Yes        | Yes             | 2           | 4.8               | 3.5               | 60              |                 |
| 18                                                                                                                       | 71               | Male       | White       | None                                                  | Yes        | No              | 2           | 5.1               | 3.5               | 65              | 3.1             |
| 19                                                                                                                       | 47               | Male       | White       | Lisinopril, metoprolol                                | Yes        | No              | 1           | 6.0               | 3.8               | 60              | 5.1             |
| 20                                                                                                                       | 64               | Male       | White       | Hydralazine                                           | Yes        | No              | 2           | 5.1               | 2.1               | 80              | 5.3             |

| <b>Patient ID</b> | <b>Age</b> | <b>Sex</b> | <b>Race</b> | <b>BMI</b> | <b>CAD</b> | <b>HBP</b> | <b>LVH</b> | <b>LVEF</b> |
|-------------------|------------|------------|-------------|------------|------------|------------|------------|-------------|
| 1                 | 38         | Male       | White       | 35         | Yes        | No         | No         | 65          |
| 2                 | 54         | Male       | Black       | 17         | No         | No         | No         | 50          |
| 3                 | 67         | Male       | Black       | 23         | Yes        | Yes        | No         | 60          |
| 4                 | 42         | Female     | White       | 23         | No         | No         | No         | 57          |
| 5                 | 56         | Female     | White       | 28         | Yes        |            | Yes        | 60          |
| 6                 | 59         | Male       | White       | 25         | No         | No         | No         | 65          |
| 7                 | 51         | Male       | White       | 39         | No         | Yes        | No         | 55          |
| 8                 | 62         | Male       | Black       | 28         | No         | Yes        | Yes        | 55          |
| 9                 | 59         | Male       | White       | 27         | No         | Yes        | No         | 65          |
| 10                | 33         | Female     | White       |            | No         | Yes        | Yes        | 65          |
| 11                | 36         | Male       | White       | 22         | No         | No         | No         | 55          |
| 12                | 55         | Male       | Black       | 20         | No         | Yes        | No         | 70          |
| 13                | 59         | Female     | White       | 20         | Yes        | Yes        | No         | 60          |
| 14                | 51         | Female     | White       | 24         | No         | No         | No         | 70          |
| 15                | 30         | Female     | Black       | 21         | No         | No         | No         | 60          |

| <b>MRI volumes at Baseline</b>        | <b>Summary measure</b> |
|---------------------------------------|------------------------|
| Number of patients                    | 20                     |
| LVEDV (ml)                            | 185 (160, 223)         |
| LVESV (ml)                            | 67 (57, 101)           |
| LVSV (ml)                             | 116 (97, 140)          |
| LVEF (%)                              | 60 (56, 66)            |
| LV Regurgitant Volume (ml)            | 54 (22, 67)            |
| Regurgitant fraction (%) <sup>a</sup> | 44% (23%, 56%)         |

**Data presented as median interquartile range (Q1, Q3), ml= milliliters  
Regurgitant fraction calculated by dividing LV regurgitant volume/LV stroke volume  
MRI: Magnetic resonance imaging**

## Supplemental Figure 1

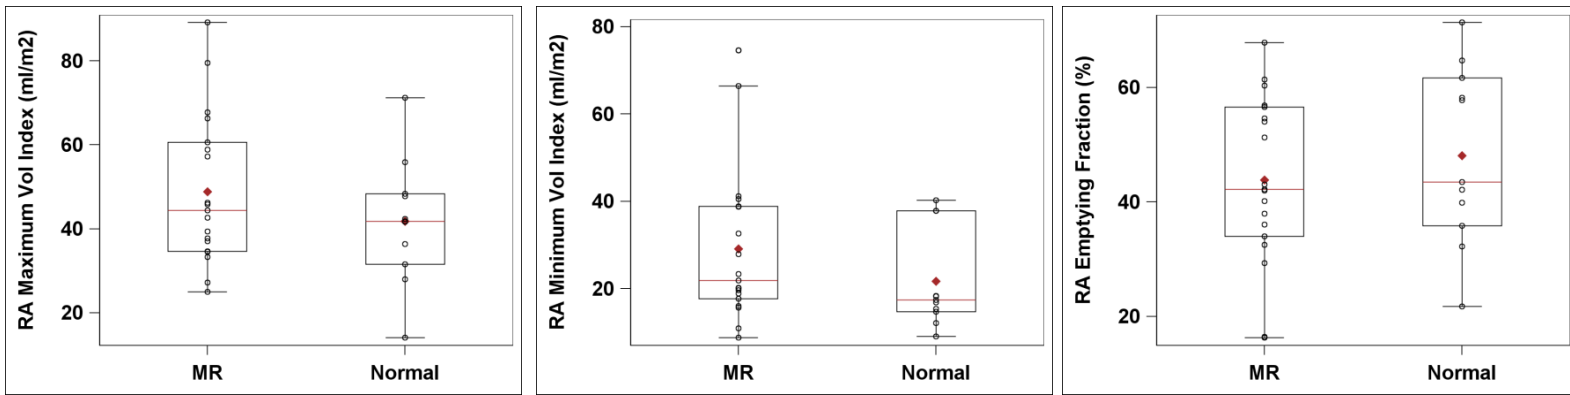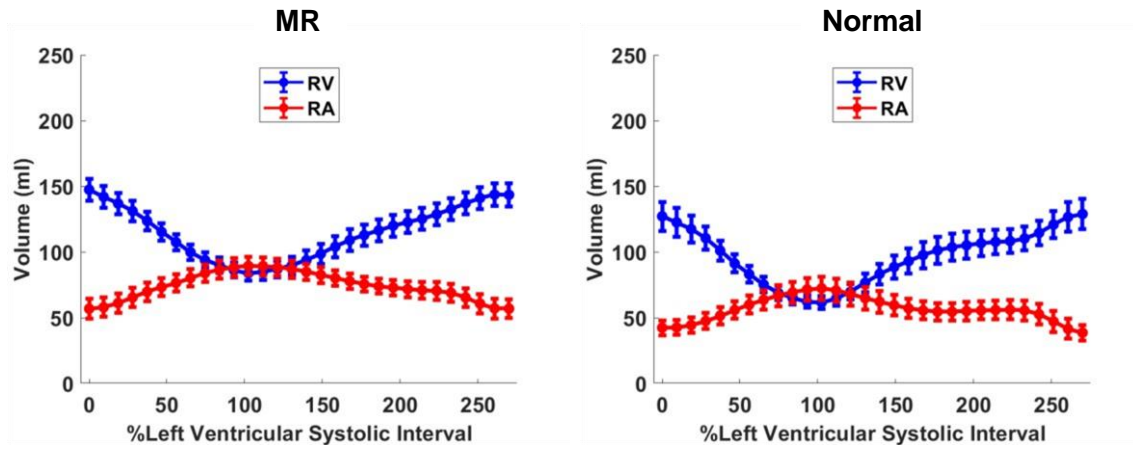

**Figure 1.** (A) Box plots demonstrating RA and RV (blue) maximum and minimum volume and RA Emptying fraction in MR (n=20) vs. normal volunteers (n=11). (B) RA (red) and RV (blue) time volume curves for the 20 MR patients and 11 normal controls.



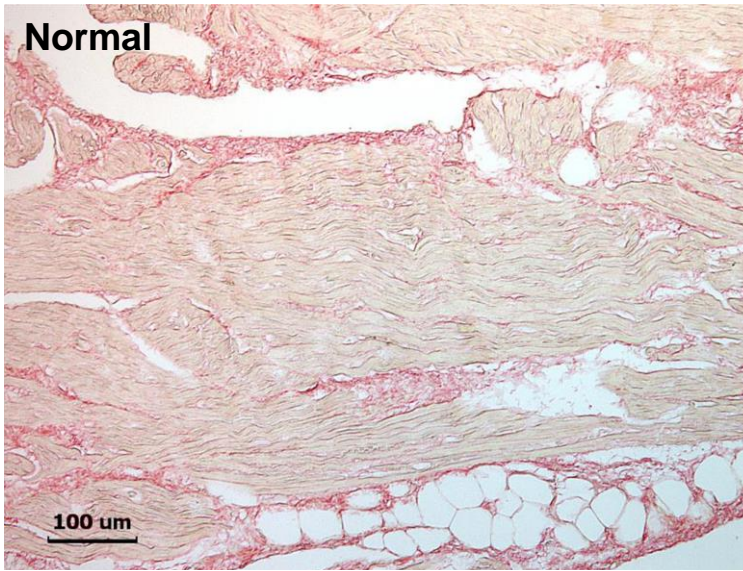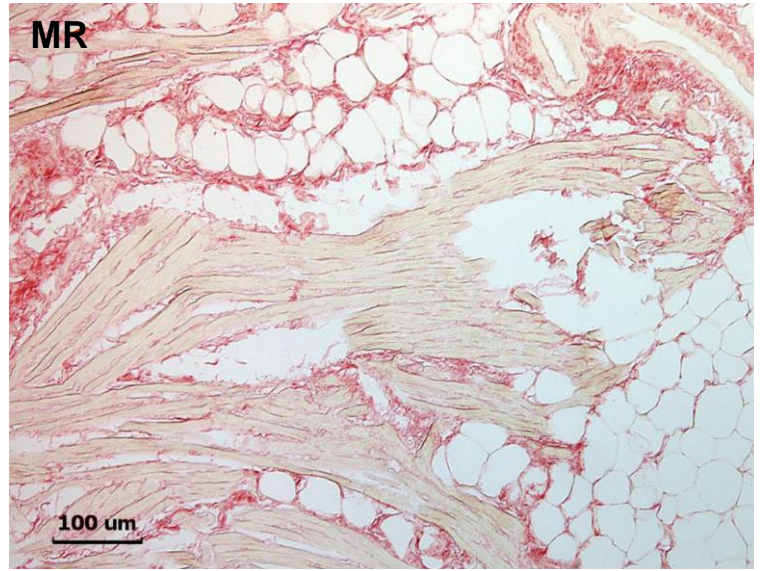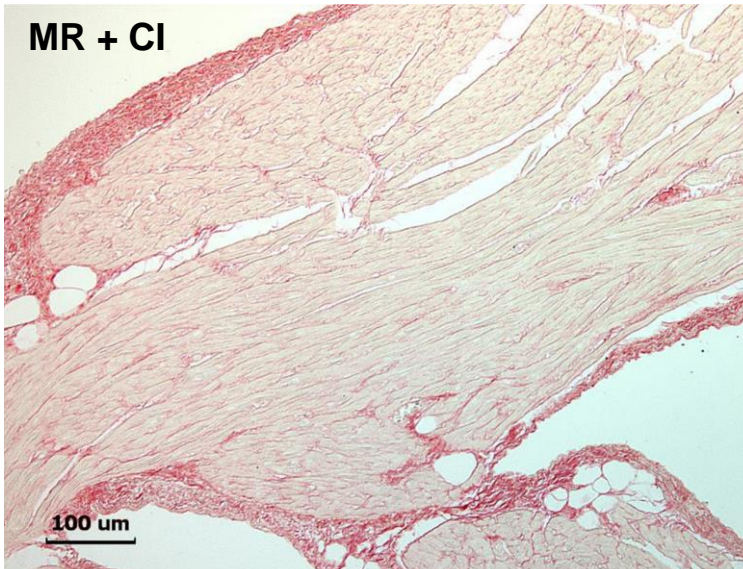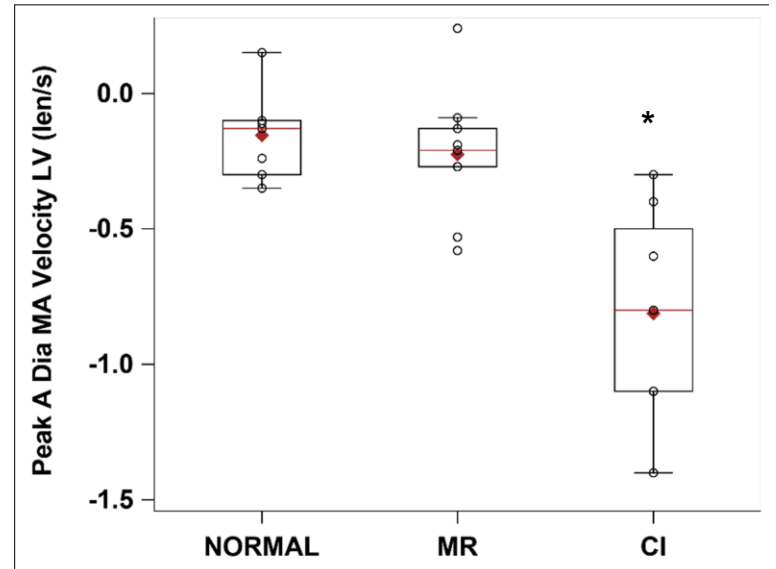

**Supplemental Figure 2.** Picric acid Sirius red staining demonstrates extensive fibro-fatty infiltration in the LA of the MR dog compared to Normal. Chymase inhibition (MR + CI) markedly reduces this structural damage restoring a linear and cross-sectional array of myocytes resulting in improved peak A Mitral Annular (MA) diastolic velocity (bar graph, lower left). \* =  $p < 0.01$  CI vs Normal and MR.
